# Supplementary material for: Immunological characteristics and T-cell receptor clonal diversity in children with systemic juvenile idiopathic arthritis undergoing T-cell-depleted autologous stem cell transplantation
Source: PubMed Central journal article supplement — Immunology. 2014 Apr 24;142(2):227–36. doi: 10.1111/imm.12245 (PMC4008230; doi:10.1111/imm.12245), 2014-04-24
Supplement: imm0142-0227-sd1.pdf [file imm0142-0227-sd1.pdf]

## Supplementary information for Wu et al T cell repertoire post ASCT in sJIA

### Supplementary Tables

#### Supplementary Table S1. Primer Sequences.

| Primer      | Sequence 5' - 3'                                                | Primer   | Sequence 5' - 3'         |
|-------------|-----------------------------------------------------------------|----------|--------------------------|
| Cb RV       | GGGTGTGGGAGATCTCTGC                                             | Vb13a FW | GGTATCGACAAGACCCAGGCA    |
| Cb 5'FAM RV | ACACAGCAGCCTCGGGTGGG                                            | Vb13b FW | AGGCTCATCCATTATTCAAATAC  |
| Vb1 FW      | CCGCACAACAGTTCCCTGACTTGC                                        | Vb14 FW  | GGGCTGGGCTTAAGGCAGATCTAC |
| Vb2 FW      | CACAACTATGTTTTGGTATCGTC                                         | Vb15 FW  | CAGGCACAGGCTAAATTCTCCCTG |
| Vb3 FW      | CGCTTCTCCCTGATTCTGGAGTCC                                        | Vb16 FW  | GCCTGCAGAACTGGAGATTCTGG  |
| Vb4 FW      | TTCCCATCAGCCGCCCAAACCTAA                                        | Vb17 FW  | TCCTCTCACTGTGACATCGGCCCA |
| Vb5 FW      | GATCAAAACGAGAGGACAGC                                            | Vb18 FW  | CTGCTGAATTTCCCAAAGAGGGCC |
| Vb6a FW     | GATCCAATTTTCAGGTCATACTG                                         | Vb20 FW  | TGCCCCAGAATCTCTCAGCCTCCA |
| Vb6b FW     | 1:1 mixture of:<br>CAGGGSCCAGAGTTTCTGAC<br>CAGCTGCGAGAGTTTCTGAC | Vb21 FW  | GGAGTAGACTCCACTCTCAAG    |
| Vb7 FW      | CCTGAATGCCCAACAGCTCT                                            | Vb22 FW  | GATCCGGTCCACAAAGCTGG     |
| Vb8 FW      | GGTACAGACAGACCATGATGC                                           | Vb23 FW  | ATTCTGAACTGAACATGAGCTCCT |
| Vb9 FW      | TTCCCTGGAGCTTGGTGA CTCTGC                                       | Vb24 FW  | GACATCCGCTCACCAGGCCTG    |
| Vb11 FW     | GTCAACAGTCTCCAGAATAAGG                                          | M13 FW   | GTAAAACGACGGCCAG         |
| Vb12 FW     | TCCYCCTCACTCTGGAGTC                                             | M13 RV   | CAGGAAACAGCTATGAC        |

Cb: constant region of the T cell receptor beta chain; Vb: variable region of the T cell receptor beta chain; 5'FAM: 5'FAM labeled primer; RV: reverse; FW: forward; S: represents C or G; Y: represents C or T.

**Supplementary Table S2. Absolute cell counts for patient 1.**

|                | full blood count                                      |                                                              |                                                              | Lymphocyte subsets                                          |                                                            |                                                                 |                                                                 |
|----------------|-------------------------------------------------------|--------------------------------------------------------------|--------------------------------------------------------------|-------------------------------------------------------------|------------------------------------------------------------|-----------------------------------------------------------------|-----------------------------------------------------------------|
|                | white blood cell count<br>[x 10 <sup>9</sup> cells/L] | neutrophil count<br>[x 10 <sup>9</sup> cells/L (%)]<br>1.5-8 | lymphocyte count<br>[x 10 <sup>9</sup> cells/L (%)]<br>1.5-7 | CD19+<br>[x 10 <sup>9</sup> cells/L (%)]<br>0.2-1.6 (10-31) | CD3+<br>[x 10 <sup>9</sup> cells/L (%)]<br>0.7-4.2 (55-78) | CD3+ CD4+<br>[x 10 <sup>9</sup> cells/L (%)]<br>0.3-2.0 (27-53) | CD3+ CD8+<br>[x 10 <sup>9</sup> cells/L (%)]<br>0.3-1.8 (19-34) |
| normal range*: | 5-15                                                  |                                                              |                                                              |                                                             |                                                            |                                                                 |                                                                 |
| 1 mo pre       | 6.82                                                  | 3.41 (50)                                                    | 2.73 (40)                                                    | N/D                                                         | N/D                                                        | N/D                                                             | N/D                                                             |
| at transplant  | 2.9                                                   | 2.7 (93)                                                     | 0.03 (1)                                                     | N/D                                                         | N/D                                                        | N/D                                                             | N/D                                                             |
| 1 mo post      | 4.33                                                  | 2.21 (51)                                                    | 1.34 (31)                                                    | 0.01 (1)                                                    | 0.98 (73)                                                  | 0.20 (15)                                                       | 0.83 (62)                                                       |
| 1 yr post      | 7.66                                                  | 3.63 (47.3)                                                  | 2.88 (37.6)                                                  | 0.75 (26)                                                   | 1.58 (55)                                                  | 0.69 (24)                                                       | 0.86 (30)                                                       |
| 2 yr post      | 6.82                                                  | 3.62 (53)                                                    | 2.22 (32.6)                                                  | 0.64 (29)                                                   | 1.29 (58)                                                  | 0.75 (34)                                                       | 0.42 (19)                                                       |

N/D: not determined; \* according to Commans-Bitter et al 1997<sup>1</sup>

## Supplementary Figure

### Patient 2 CD8<sup>+</sup> TCRVb family usage

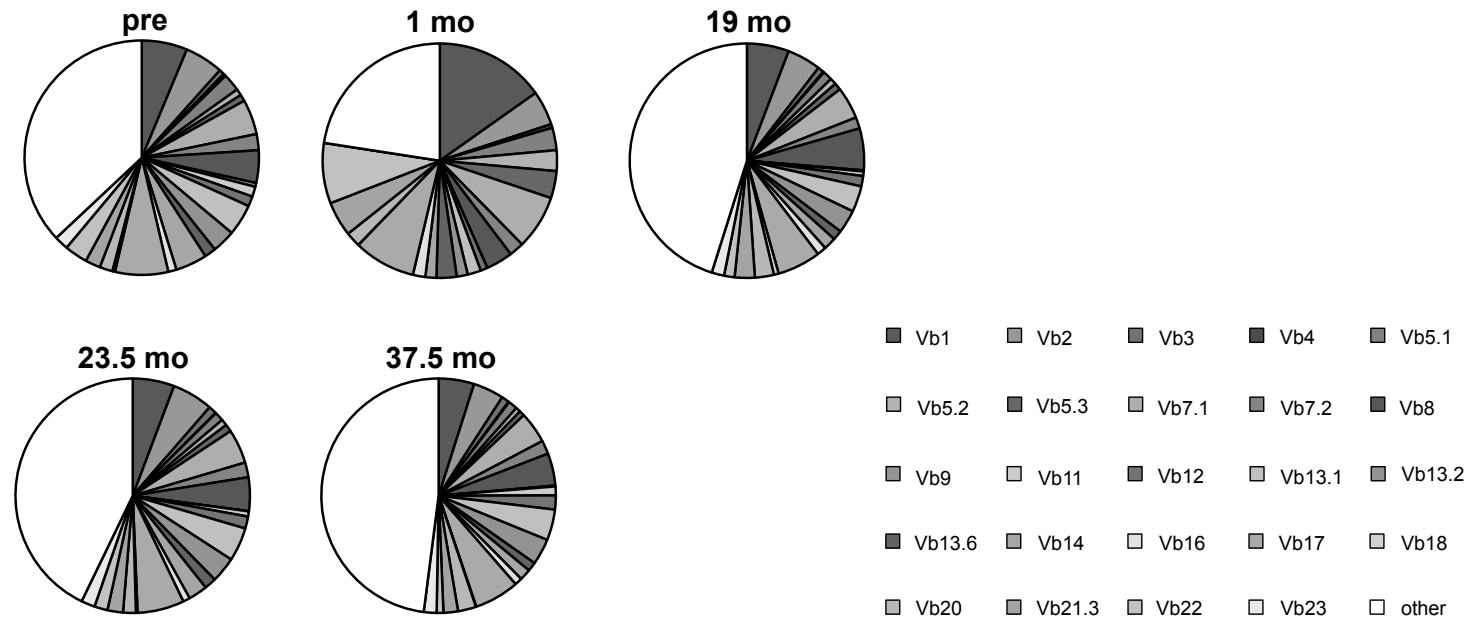

**Supplementary Figure S1. TCRVb expression before and after ASCT.** Frequency of expression of 24 TCRVb families was assessed using flow cytometry pre (top left), 1 month (mo) (top centre), 19 mo (top right), 23.5 mo (bottom left) and 37.5 mo (bottom centre) post transplant in the CD8<sup>+</sup> T cell subset in Patient 2. Gated on live CD8<sup>+</sup> T cells and then each TCRVb population. Pie charts show relative proportion of Frequency of total cells positive for each TCRVb shown (in grayscale), with other (in white) representing frequency of CD8<sup>+</sup> T cells not accounted for by any of the 24 TCRVb families investigated.

## Supplementary Reference

1. Comans-Bitter WM, de Groot R, van den Beemd R, Neijens HJ, Hop WC, Groeneveld K, et al. Immunophenotyping of blood lymphocytes in childhood. Reference values for lymphocyte subpopulations. *J Pediatr* 1997; 130:388-93.
